# Supplementary material for: Antioxidant, Physicochemical, and Cellular Secretion of Glucagon-Like Peptide-1 Properties of Oat Bran Protein Hydrolysates
Source: MDPI journal article supplement (doi:10.3390/antiox9060557), 2020-06-26
Supplement: s1 [file s1]

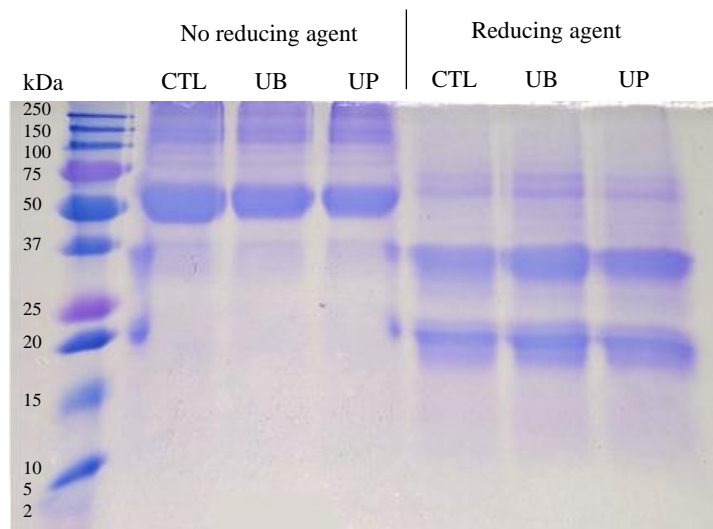

**Suppl. Figure 1:** SDS-PAGE gel electrophoresis of isolated proteins in the absence and in the presence of a reducing agent. Samples (25  $\mu$ g) were run on a 12% resolving gel and 4% stacking gel for 1 hour at 120V and. Samples control (CTL) and brans pre-treated with ultrasonic bath (UB) or ultrasonic probe (UP) ultrasounds.

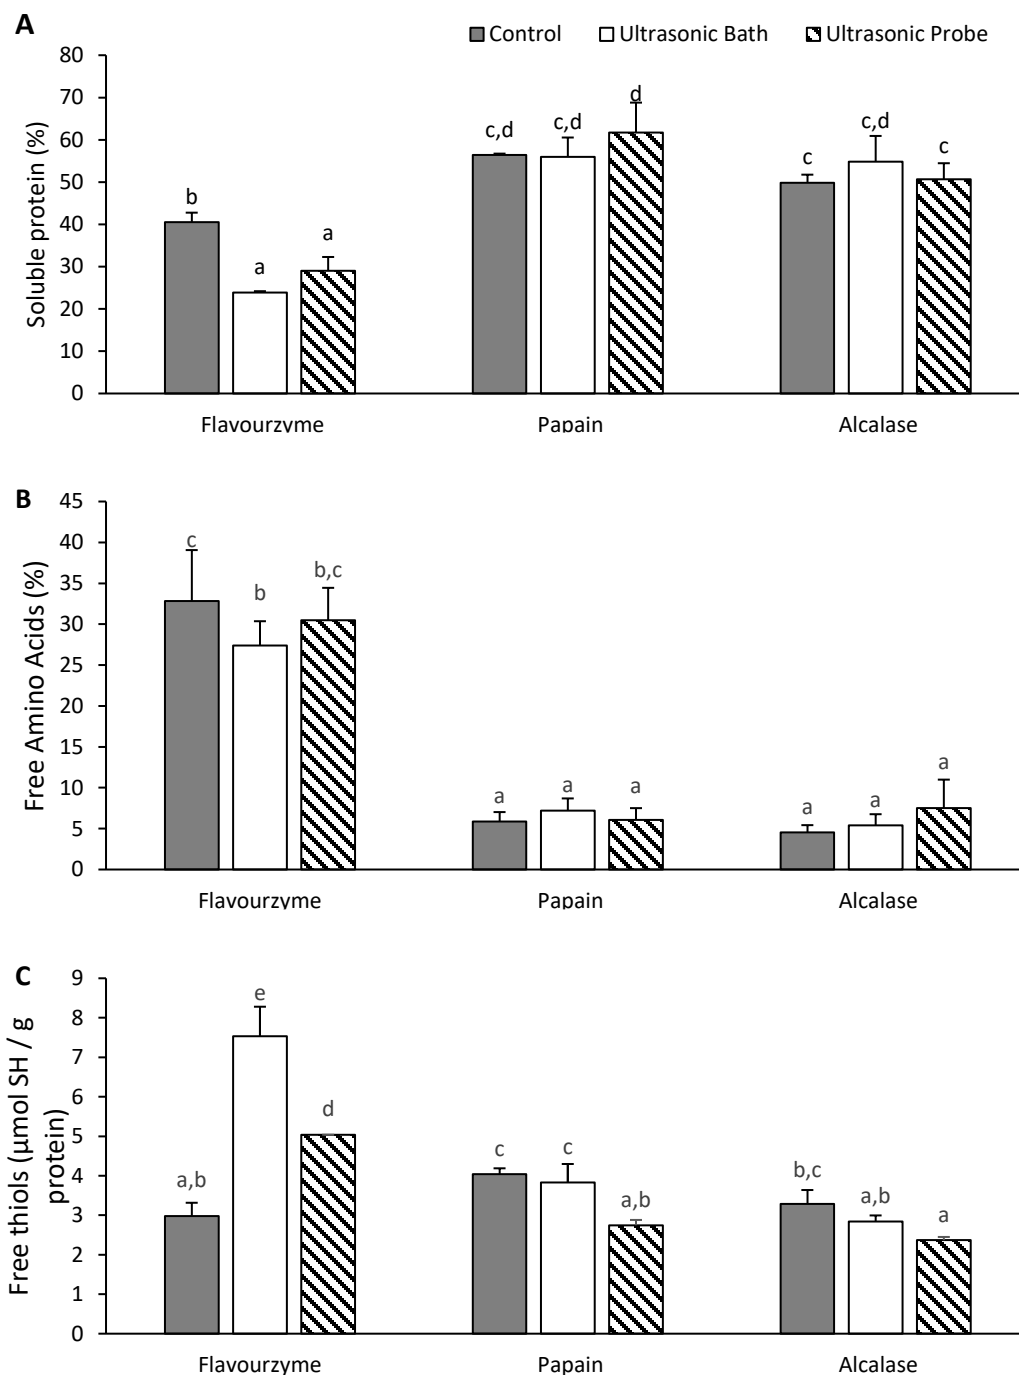

**Suppl. Figure 2:** A) Soluble protein contents of hydrolysates in weight percentages; B) Concentration of free amino acids (FAA,  $\mu\text{g/g}$  hydrolysate); C) Concentration of free sulphydryl or thiol (SH) groups ( $\mu\text{g/g}$  protein). Data are means of triplicates  $\pm$  standard deviation. Value with different letters are significantly different as determined by a one-way ANOVA coupled with a least significant difference (LSD) test ( $p$ -value  $< 0.05$ ).
