# Supplementary material for: Antioxidant, Physicochemical, and Cellular Secretion of Glucagon-Like Peptide-1 Properties of Oat Bran Protein Hydrolysates
Source: MDPI journal article supplement (doi:10.3390/antiox9060557), 2020-06-26
Supplement: s1 [file s1]

**Suppl. Table 1:** Composition of extracted proteins from oat brans. Each protein isolate was analyzed using LC-MS/MS after digestion by trypsin. Myoglobin was used as a control, and the sequences were analyzed using Mascot<sup>TM</sup> Software. (-) indicates an absence of protein. Proteins are from control (CTL) and brans pre-treated with ultrasonic bath (UB) or ultrasonic probe (UP) ultrasounds.

| NCBIInr protein i.d. | Protein name                | MW (Da) | Sample | Coverage (%) |
|----------------------|-----------------------------|---------|--------|--------------|
| P12615.1             | 12S Seed Storage Globulin 1 | 58964   | CTL    | 33           |
|                      |                             |         | UB     | 34           |
|                      |                             |         | UP     | 31           |
| P14812.1             | 12S Seed Storage Globulin 2 | 59038   | CTL    | 34           |
|                      |                             |         | UB     | 36           |
|                      |                             |         | UP     | 35           |
| CAA52764.1           | 11S Globulin                | 59768   | CTL    | 33           |
|                      |                             |         | UB     | 30           |
|                      |                             |         | UP     | 30           |
| CAA54152             | 12S Globulin                | 53737   | CTL    | 30           |
|                      |                             |         | UB     | 29           |
|                      |                             |         | UP     | 30           |
| CAA54153.1           | 12S Globulin                | 58531   | CTL    | 25           |
|                      |                             |         | UB     | 25           |
|                      |                             |         | UP     | 25           |
| CAA52763.1           | 11S Globulin                | 62223   | CTL    | 31           |
|                      |                             |         | UB     | 27           |
|                      |                             |         | UP     | 25           |
| P27919.1             | Avenin                      | 24670   | CTL    | 25           |
|                      |                             |         | UB     | 25           |
|                      |                             |         | UP     | 38           |
| CBL51494.1           | Avenin protein              | 26116   | CTL    | 24           |
|                      |                             |         | UB     | 24           |
|                      |                             |         | UP     | 24           |
| CBL51489.1           | Avenin protein              | 26391   | CTL    | 26           |
|                      |                             |         | UB     | 26           |
|                      |                             |         | UP     | 26           |
| AAA32716.1           | Avenin                      | 25911   | CTL    | 8            |
|                      |                             |         | UB     | 8            |
|                      |                             |         | UP     | -            |
| AFJ04424.1           | Vromindoline                | 17007   | CTL    | -            |
|                      |                             |         | UB     | 19           |
|                      |                             |         | UP     | 29           |
| AAB32025.1           | Alcohol soluble avenin-3    | 23718   | CTL    | -            |
|                      |                             |         | UB     | 14           |
|                      |                             |         | UP     | 34           |
| Q09114.1             | Avenin-E                    | 21479   | CTL    | -            |
|                      |                             |         | UB     | 19           |
|                      |                             |         | UP     | 35           |
| ABU39831.1           | Tryptophanin                | 16461   | CTL    | -            |
|                      |                             |         | UB     | -            |
|                      |                             |         | UP     | 33           |
